# Supplementary material for: Highly enhanced methanol gas sensing properties by Pd0.5Pd3O4nanoparticle loaded ZnO hierarchical structures
Source: Royal Society of Chemistry journal article supplement (doi:10.1039/c4ra05462h), 2014-07-28
Supplement: c4ra05462h1.pdf [file c4ra05462h1.pdf]

## Electronic Supplementary Information for

### **Highly enhanced methanol gas sensing properties by Pd<sub>0.5</sub>Pd<sub>3</sub>O<sub>4</sub> nanoparticles loaded ZnO hierarchical structures**

Shuangming Wang, Pan Wang, Zhifang Li, Chuanhai Xiao, Bingxin Xiao, Rui Zhao, Tianye Yang  
and Mingzhe Zhang\*

State Key Laboratory of Superhard Materials, Jilin University, Changchun 130012, People's  
Republic of China.

\* Corresponding author. E-mail address: zhangmz@jlu.edu.cn.

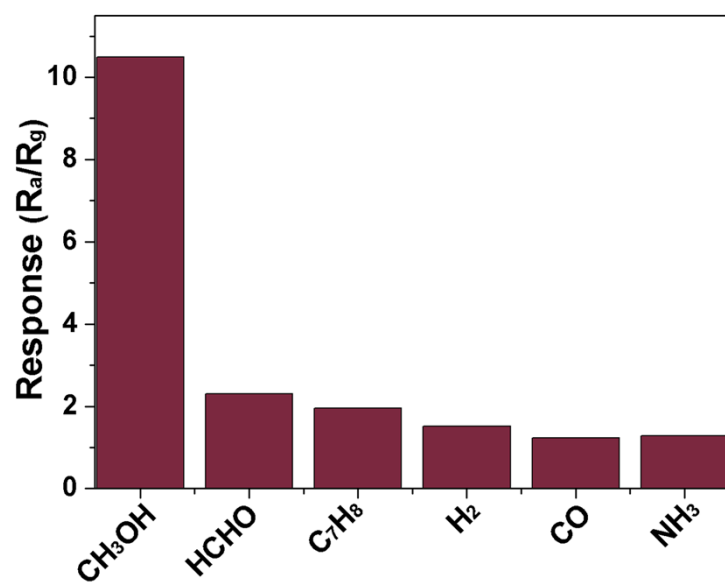

Fig. S1 Responses of the sensor based on Pd<sub>0.5</sub>Pd<sub>3</sub>O<sub>4</sub>-loaded ZnO to 50 ppm various testing gases at 260 °C.
